# Supplementary material
Source: Elsevier journal article supplement (https://www.sciencedirect.com/science/article/pii/S0014256517301510)
Supplement: mmc1 [file S0014256517301510:mmc1.doc]

**TABLA 1. Recursos en Internet para la desprescripción y la toma de decisiones compartidas** con el paciente

| **Sitios web disponibles con información, recursos y herramientas de ayuda para**  **la desprescripción** |
| --- |
| http://deprescribing.org/   - Canadá. Bruyère Research Institute. Ottawa. Institut universitaire de gériatrie de Montréal. - Dirigida a profesionales de la salud, pacientes, investigadores. - Información genérica sobre desprescripción. - Algoritmos de apoyo a desprescripción de IBP, benzodiazepinas, antipsicóticos y antidiabéticos. - Folletos para pacientes: hipnóticos, IBP, sulfonilureas, antipsicóticos, antihistamínicos. |
| http://medstopper.com/   - Canadá. University of British Columbia. - Dirigida a profesionales de la salud. - Herramienta de ayuda a la desprescripción: tras introducir la lista de fármacos, categoriza entre los que tienen mayor prioridad de retirada frente a los de menor prioridad. - Se basa en tres criterios clave: el potencial del fármaco para mejorar los síntomas, el riesgo de enfermedad futura y su probabilidad de causar daño. - También proporciona sugerencias para reducir el consumo de fármacos. |
| <http://www.primaryhealthtas.com.au/>resources/deprescribing   - Australia. Primary Health Tasmania. - Dirigida a profesionales de la salud y pacientes. - Información genérica sobre desprescripción. - Algoritmos de apoyo a desprescripción de vitamina D y calcio, sulfonilureas, estatinas, IBP, opioides, AINEs, inhibidores de colinesterasa, bifosfonatos, benzodiazepinas, antipsicóticos, antiagregantes, antihipertensivos, alopurinol. - Folletos para pacientes: hipnóticos, IBP, sulfonilureas, antipsicóticos, antihistamínicos |
| http://pathclinic.ca/resources/   - Canadá. Dalhousie University. - Dirigida a profesionales de la salud. - Ayudas en desprescripción para ancianos frágiles con hiperlipemia o hipertensión arterial. |
| http://www.polypharmacy.scot.nhs.uk/   - Escocia. Scotland NHS. - Dirigida a profesionales de la salud. - Herramienta “7 *steps*“ de ayuda para la desprescripción (fármaco a fármaco). - “*Medicines to look out for*” listadas por sistemas y fármacos. - *Reviewing medication need & effectiveness* (NNT) por enfermedad y por fármaco. - Tabla de efectos adversos por fármacos. |
| <http://www.bpac.org.nz/BPJ/> 2010/April/stopguide.aspx   - Best Practice Advocacy Centre. New Zealand. - Dirigida a profesionales sanitarios. - Información general sobre desprescripción. - Información específica sobre desprescripción de antidepresivos, benzodiacepinas, antihipertensivos, estatinas, warfarina, AINEs, IBP, bifosfonatos, corticoides orales, antiparkinsonianos. |
| http://www.choosingwiselycanada.org/in-action/toolkits/   - *Choosing Wisely Canada* - Dirigida a profesionales sanitarios y pacientes. - Herramientas para deprescripción de IBP, benzodiacepinas, hipnóticos y antipsicóticos. “*Bye-Bye*, PPI”, “*Less sedatives for your older relatives*”, “*When psychosis isn´t the diagnosis*” - Folletos para pacientes: hipnóticos, antipsicóticos, IBP. |
| http://consumerhealthchoices.org/   - Dirigida a pacientes. - Hojas informativas de desprescripción para pacientes apoyadas por *Choosing Wisely*: sedantes en el insomnio, opioides en el dolor crónico, estatinas, antipsicóticos en la demencia. |
| **Sitios web disponibles con información, recursos y herramientas de ayuda para la toma de decisiones compartidas con el paciente** |
| <https://www.ahrq.gov/professionals/education/curriculum-tools/>shareddecisionmaking/index.html   - *Agency for Healthcare Research and Quality*. EEUU. - Dirigida a profesionales sanitarios. - Formación en toma de decisiones compartida: cursos, guías, presentaciones, vídeos. |
| http://shareddecisions.mayoclinic.org/   - *Mayo Clinic*. EEUU. - Dirigida a profesionales y pacientes. - Herramientas de ayuda en la toma de decisiones compartida: hojas informativas, herramientas electrónicas interactivas con calculadoras de riesgo y recursos gráficos para el paciente. - Prevención cardiovascular (estatinas y aspirina), antidepresivos, diabetes, osteoporosis, artritis reumatoide. |
| https://decisionaid.ohri.ca/index.html   - *Otawa Hospital*. *Research Institute.* - Dirigida a pacientes. - Enlaces a web externas con información de ayuda en la toma de decisiones compartidas de más de 100 enfermedades. |

AINEs: antiinflamatorios no esteroideos; EEUU: Estados Unidos de Norteamérica; IBP: inhibidores de la bomba de protones; NNT: número de pacientes que es necesario tratar
